# Supplementary material for: Dietary Vitamin C and Vitamin C Derived from Vegetables Are Inversely Associated with the Risk of Depressive Symptoms among the General Population
Source: MDPI journal article supplement (doi:10.3390/antiox10121984), 2021-12-13
Supplement: s1 [file s1]

**Table S2.** The characteristics of participants with high or low vitamin C intake from vegetables

|                                                        | Low Vitamin C Intake from Vegetables ( $\leq 50$ mg/day) | High Vitamin C Intake from Vegetables ( $> 50$ mg/day) | <i>p</i> Value |
|--------------------------------------------------------|----------------------------------------------------------|--------------------------------------------------------|----------------|
| Number of participants (%) <sup>a</sup>                | 13735 (74.89)                                            | 4606 (25.11)                                           | 0.0029         |
| Age (year) <sup>a</sup>                                | 4592 (33.43)                                             | 1305 (28.33)                                           |                |
| 18-39                                                  | 4370 (31.82)                                             | 1501 (32.59)                                           |                |
| 40-59                                                  | 4773 (34.75)                                             | 1800 (39.08)                                           |                |
| $\geq 60$                                              |                                                          |                                                        | 0.0288         |
| Gender (%) <sup>a</sup>                                | 6524 (47.50)                                             | 2302 (49.98)                                           |                |
| Male                                                   | 7211 (52.50)                                             | 2304 (50.02)                                           |                |
| Female                                                 |                                                          |                                                        | 0.0036         |
| Race/ethnicity (%) <sup>a</sup>                        | 1919 (13.97)                                             | 588 (12.77)                                            |                |
| Mexican American                                       | 1281 (9.33)                                              | 417 (9.05)                                             |                |
| Other Hispanic                                         | 6209 (45.21)                                             | 1872 (40.64)                                           |                |
| Non-Hispanic White                                     | 3026 (22.03)                                             | 976 (21.19)                                            |                |
| Non-Hispanic Black                                     | 1300 (9.46)                                              | 753 (16.35)                                            |                |
| Other races                                            |                                                          |                                                        | < 0.001        |
| Educational level (%) <sup>a</sup>                     | 2888 (21.68)                                             | 690 (15.50)                                            |                |
| < high school                                          | 7219 (54.19)                                             | 2224 (49.94)                                           |                |
| High school                                            | 3214 (24.13)                                             | 1539 (34.56)                                           |                |
| > high school                                          |                                                          |                                                        | 0.3333         |
| Material status (%) <sup>a</sup>                       | 8684 (64.32)                                             | 2943 (64.95)                                           |                |
| Married/living with partner                            | 4817 (35.6)                                              | 1588 (35.05)                                           |                |
| Widowed/divorced/separated/never married               |                                                          |                                                        |                |
| Poverty-income ratio (%) <sup>a</sup>                  |                                                          |                                                        | 0.0021         |
| $\leq 0.99$                                            | 11223 (81.71)                                            | 3958 (85.93)                                           |                |
| $\geq 1$                                               | 2512 (18.29)                                             | 648 (14.07)                                            |                |
| Body mass index (%) <sup>a</sup>                       |                                                          |                                                        | 0.1725         |
| < 25 kg/m <sup>2</sup>                                 | 3810 (28.00)                                             | 1368 (29.95)                                           |                |
| 25 to <30 kg/m <sup>2</sup>                            | 4437 (32.61)                                             | 1517 (33.22)                                           |                |
| $\geq 30$ kg/m <sup>2</sup>                            | 5359 (39.39)                                             | 1682 (36.83)                                           |                |
| Work activity (%) <sup>a</sup>                         |                                                          |                                                        | 0.1997         |
| Vigorous                                               | 2668 (19.43)                                             | 929 (20.18)                                            |                |
| Moderate                                               | 3085 (22.47)                                             | 1056 (22.94)                                           |                |
| Other                                                  | 7975 (58.09)                                             | 2618 (56.88)                                           |                |
| Recreational activity (%) <sup>a</sup>                 |                                                          |                                                        | < 0.001        |
| Vigorous                                               | 3024 (22.02)                                             | 1360 (29.53)                                           |                |
| Moderate                                               | 3642 (26.52)                                             | 1251 (27.17)                                           |                |
| Other                                                  | 7066 (51.46)                                             | 1994 (43.30)                                           |                |
| Alcohol consumption (%) <sup>a</sup>                   | 9895 (73.29)                                             | 3741 (81.66)                                           | < 0.001        |
| Smoke at least 100 cigarettes in life (%) <sup>a</sup> | 5835 (43.57)                                             | 1803 (39.43)                                           | 0.0002         |
| stroke <sup>a</sup>                                    |                                                          |                                                        |                |
| Diabetes (%) <sup>a</sup>                              | 523 (4.00)                                               | 159 (3.55)                                             | 0.2668         |
| Hypertension (%) <sup>a</sup>                          | 1866 (13.59)                                             | 635 (13.79)                                            | 0.5193         |
| Total energy (kcal/d) <sup>b</sup>                     | 7554 (55.00)                                             | 2627 (57.03)                                           | 0.3944         |
|                                                        | 1905 (964.5)                                             | 2009 (1039)                                            | < 0.001        |
