# Supplementary material for: Dietary Vitamin C and Vitamin C Derived from Vegetables Are Inversely Associated with the Risk of Depressive Symptoms among the General Population
Source: MDPI journal article supplement (doi:10.3390/antiox10121984), 2021-12-13
Supplement: s1 [file s1]

**Table S1.** The classifications of covariates.

| <b>Covariates</b>                         | <b>Classifications</b>                                                               |
|-------------------------------------------|--------------------------------------------------------------------------------------|
| Gender                                    | Male; Female                                                                         |
| Age (year)                                | 18-39; 40-59; ≥60                                                                    |
| Educational level                         | Below high school; High school; Above high school                                    |
| Marital status                            | Married/living with partner; Widowed/divorced/separated/ Never married/              |
| Poverty-income ratio                      | ≤0.99; and ≥1                                                                        |
| Race                                      | Mexican American; Other Hispanic; Non-Hispanic White; Non-Hispanic Black; Other race |
| Body mass index (BMI)                     | ≤25 kg/m <sup>2</sup> ; 25 to <30 kg/m <sup>2</sup> ; ≥30 kg/m <sup>2</sup>          |
| Smoked at least 100 cigarettes in life    | No; Yes                                                                              |
| Had at least 12 alcohol drinks/year       | No; Yes                                                                              |
| Occupational physical activity            | Vigorous; Moderate; Other                                                            |
| Recreational physical activity            | Vigorous; Moderate; Other                                                            |
| Hypertension <sup>a</sup>                 | No; Yes                                                                              |
| Diabetes <sup>b</sup>                     | No; Yes                                                                              |
| Stroke <sup>c</sup>                       | No; Yes                                                                              |
| Total energy intake (kcal/d) <sup>d</sup> | Continuous                                                                           |

<sup>a</sup> Systolic blood pressure (SBP) ≥130 mm Hg, or diastolic blood pressure (DBP) ≥80 mm Hg, or currently taking antihypertensive drugs were hypertensive patients. <sup>b</sup> Diabetes was defined as self-reported physician diagnosis or taking insulin, or anti-diabetic pills. <sup>c</sup> Stroke was defined as self-reported physician diagnosis of stroke. <sup>d</sup> Total energy intake of each participant was the average of two 24-hour dietary energy intake.
