# Supplementary figures and images for: Dietary Vitamin C and Vitamin C Derived from Vegetables Are Inversely Associated with the Risk of Depressive Symptoms among the General Population
Source: MDPI journal article supplement (doi:10.3390/antiox10121984), 2021-12-13

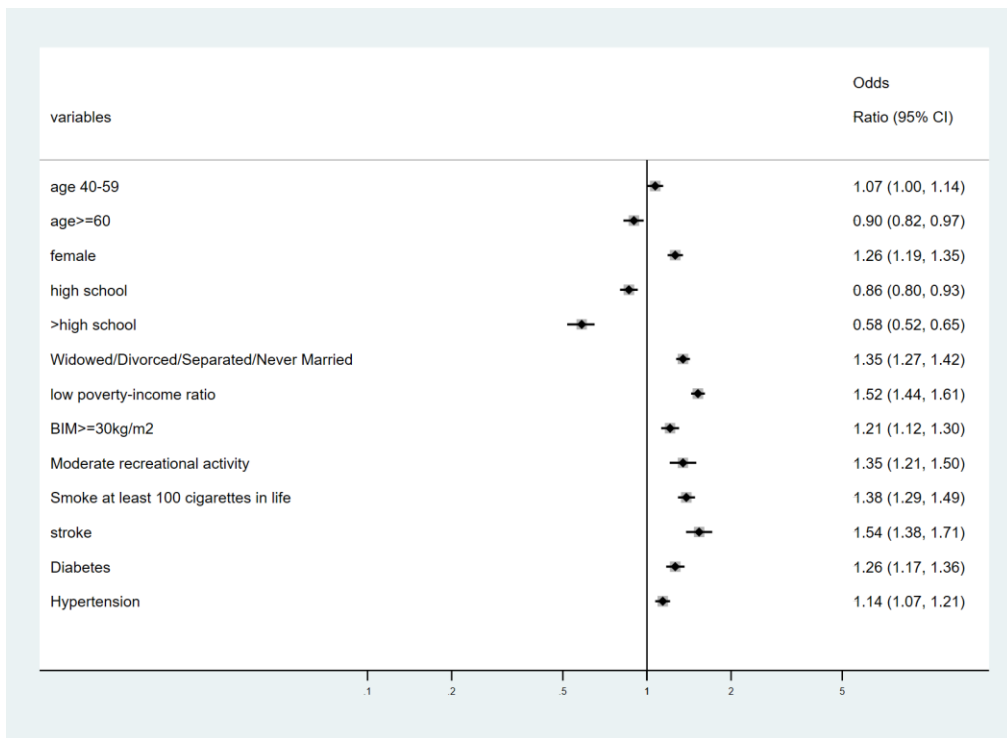

Figure S1: How each covariate affects the depressive symptoms outcome.

Supplement: s1 [file s1]
